# Supplementary material
Source: PubMed Central journal article supplement (PMC2396250)
Supplement: supp_38_6_724__1.pdf [file supp_38_6_724__1.pdf]

**Literature Mining using MedGene and BioGene Database for Genes Related to:**

**A Genome-Wide Expression Analysis in Blood Identifies  
Pre-Elafin as a Biomarker in ARDS**

Zhaoxi Wang, Douglas Beach, Li Su, Rihong Zhai, and David C. Christiani

**Online Data Supplement**

## **ARDS**

MedGene and BioGene are literature mining projects sponsored by Harvard Institute of Proteomics (<http://www.hip.harvard.edu>) for the creation of human gene-to-disease co-occurrence network of all named human genes and all human diseases by automated analysis of MeSH indexes, title and abstracts in millions of Medline records (25). We used web-based interface of MedGene database (by 3/14/2007) hosted at Harvard Institute of Proteomics to conduct literature mining for genes associated with ARDS (MeSH disease term: Respiratory Distress Syndrome, Adult) in the Medline Database. We also searched BioGene database (by 3/14/2007) for genes associated with ARDS-related MeSH vocabularies, including neutrophil, leukotriene, and prostaglandin. The statistical method used to rank the gene list was the product of frequency. The database only allowed downloading maximum number of 100 top-ranked genes for each term of disease or MeSH vocabulary, without specific request for longer gene list. The numbers of top-ranked genes of MeSH mining are the combined lists of non-redundant genes of all sub-vocabularies available at BioGene. In addition, we used MedGene to sort the linkage of genes identified by paired *t*-tests and ARDS into four categories, including directly link (first-degree association), directly linked by gene family term, indirect link through other ARDS genes, and not previously associated with ARDS.

**Table E1. Characterization of Study Population for ELISA Assay**

|                                                              | <b>ARDS</b>   | <b>Control</b> | <b><i>p</i></b> |
|--------------------------------------------------------------|---------------|----------------|-----------------|
|                                                              | <b>(n=40)</b> | <b>(n=23)</b>  | <b>Value</b>    |
| <b>General</b>                                               |               |                |                 |
| Age, year (mean±SD)                                          | 60.5 ± 17.3   | 57.7 ± 9.2     | 0.407           |
| Gender, (male/female)                                        | 12/11         | 24/16          | 0.547           |
| APACHE III score, (mean±SD)                                  | 79.7 ± 24.3   | 69.7 ±15.4     | 0.052           |
| Thrombocytopenia (platelets<80,000 mm <sup>-3</sup> ), N (%) | 9 (22.5)      | 4 (17.4)       | 0.753           |
| Creatinine >2.0 mg/dL, N (%)                                 | 16 (40.0)     | 6 (26.1)       | 0.265           |
| Total bilirubin > 2.0 mg/dL, N (%)                           | 8 (20.0)      | 3 (13.0)       | 0.732           |
| Transfusion of PRBC, N (%)                                   | 29 (72.5)     | 9 (39.1)       | 0.009           |
| Number of PRBC transfused                                    | 4.8 ± 6.3     | 3.0 ± 5.7      | 0.255           |
| Liver disease, N (%)                                         | 4 (10.0)      | 1 (4.4)        | 0.644           |
| End-stage renal disease, N (%)                               | 3 (7.5)       | 1 (4.4)        | 1.000           |
| Diabetes, N (%)                                              | 10 (25.0)     | 7 (30.4)       | 0.640           |
| Recent steroid use, N (%)                                    | 5 (12.5)      | 4 (17.4)       | 0.713           |
| <b>CLINICAL RISK FACTORS, N (%)</b>                          |               |                |                 |
| Direct lung injury                                           | 20 (50.0)     | 11 (47.8)      | 0.868           |
| Septic shock                                                 | 22 (55.0)     | 8 (34.8)       | 0.122           |
| Sepsis                                                       | 13 (32.5)     | 10 (43.5)      | 0.384           |
| Trauma                                                       | 2 (5.0)       | 1 (4.4)        | 1.000           |
| Multiple transfusion                                         | 7 (17.5)      | 2 (8.7)        | 0.467           |

**Table E2. Patient characteristics for subjects with plasma samples for ELISA assay**

| Patient #            | Sample Group     | Age | Gender | Etiology of ARDS                         | APACHE III* | Outcome |
|----------------------|------------------|-----|--------|------------------------------------------|-------------|---------|
| <b>ARDS patients</b> |                  |     |        |                                          |             |         |
| 1                    | pre-diagnosis    | 71  | male   | sepsis/septic shock/multiple transfusion | 72          | died    |
| 2                    | pre-diagnosis    | 89  | male   | sepsis/septic shock/pneumonia            | 79          | alive   |
| 3                    | pre-diagnosis    | 64  | male   | sepsis/septic shock/pneumonia/aspiration | 83          | died    |
| 4                    | pre-diagnosis    | 77  | female | sepsis/septic shock/pneumonia            | 86          | died    |
| 5                    | pre-diagnosis    | 55  | male   | pneumonia                                | 88          | died    |
| 6                    | pre-diagnosis    | 47  | male   | sepsis/septic shock                      | 90          | alive   |
| 7                    | pre-diagnosis    | 57  | male   | sepsis/septic shock/pneumonia            | 92          | died    |
| 8                    | pre-diagnosis    | 70  | male   | sepsis                                   | 92          | alive   |
| 9                    | pre-diagnosis    | 82  | male   | sepsis/septic shock/pneumonia            | 105         | died    |
| 10                   | pre-diagnosis    | 71  | male   | sepsis/septic shock/pneumonia            | 105         | died    |
| 11                   | pre-diagnosis    | 69  | male   | sepsis/septic shock/pneumonia            | 105         | alive   |
| 12                   | pre-diagnosis    | 73  | male   | sepsis/septic shock/multiple transfusion | 120         | died    |
| 13                   | day of diagnosis | 78  | female | sepsis/pneumonia                         | 50          | alive   |
| 14                   | day of diagnosis | 62  | female | multiple transfusion                     | 63          | alive   |
| 15                   | day of diagnosis | 66  | female | sepsis                                   | 68          | died    |
| 16                   | day of diagnosis | 52  | female | sepsis/septic shock/pneumonia            | 80          | alive   |
| 17                   | day of diagnosis | 84  | female | sepsis/pneumonia                         | 89          | died    |
| 18                   | day of diagnosis | 67  | female | sepsis/septic shock/pneumonia            | 92          | alive   |
| 19                   | day of diagnosis | 82  | female | sepsis/septic shock/pneumonia/aspiration | 99          | died    |
| 20                   | day of diagnosis | 22  | male   | sepsis/septic shock/pneumonia/aspiration | 101         | died    |
| 21                   | day of diagnosis | 93  | male   | sepsis/septic shock/pneumonia/aspiration | 116         | died    |
| 22                   | day of diagnosis | 63  | female | sepsis/septic shock                      | 123         | alive   |
| 23                   | post-diagnosis   | 45  | female | trauma                                   | 35          | alive   |
| 24                   | post-diagnosis   | 51  | female | multiple transfusion                     | 42          | alive   |
| 25                   | post-diagnosis   | 62  | female | sepsis/septic shock                      | 43          | died    |
| 26                   | post-diagnosis   | 38  | male   | sepsis/pneumonia                         | 46          | alive   |
| 27                   | post-diagnosis   | 45  | male   | sepsis/pneumonia                         | 48          | alive   |
| 28                   | post-diagnosis   | 42  | male   | sepsis/pneumonia                         | 56          | alive   |
| 29                   | post-diagnosis   | 48  | male   | sepsis/multiple transfusion              | 58          | alive   |
| 30                   | post-diagnosis   | 45  | female | sepsis/pneumonia                         | 62          | alive   |
| 31                   | post-diagnosis   | 70  | male   | sepsis                                   | 66          | died    |
| 32                   | post-diagnosis   | 34  | female | sepsis/pneumonia                         | 69          | alive   |
| 33                   | post-diagnosis   | 76  | male   | sepsis/pneumonia                         | 73          | died    |
| 34                   | post-diagnosis   | 68  | female | sepsis/septic shock/pneumonia            | 73          | alive   |
| 35                   | post-diagnosis   | 20  | male   | pneumonia/trauma/multiple transfusion    | 74          | alive   |
| 36                   | post-diagnosis   | 47  | male   | sepsis/septic shock/pneumonia            | 74          | alive   |
| 37                   | post-diagnosis   | 74  | male   | sepsis/septic shock/multiple transfusion | 85          | alive   |
| 38                   | post-diagnosis   | 45  | male   | sepsis/septic shock/pneumonia            | 106         | died    |
| 39                   | post-diagnosis   | 63  | female | sepsis/septic shock                      | 123         | alive   |
| 40                   | post-diagnosis   | 51  | female | sepsis/pneumonia                         | 132         | died    |

| Patient #               | Sample Group | Age | Gender | Etiology of ARDS                         | APACHE III* | Outcome |
|-------------------------|--------------|-----|--------|------------------------------------------|-------------|---------|
| <b>At-risk patients</b> |              |     |        |                                          |             |         |
| 1                       | control      | 44  | male   | sepsis/pneumonia                         | 34          | alive   |
| 2                       | control      | 75  | male   | sepsis/septic shock/pneumonia            | 50          | alive   |
| 3                       | control      | 45  | female | sepsis/pneumonia                         | 53          | alive   |
| 4                       | control      | 43  | male   | sepsis/pneumonia                         | 54          | alive   |
| 5                       | control      | 45  | female | sepsis                                   | 55          | alive   |
| 6                       | control      | 56  | male   | multiple transfusion                     | 59          | alive   |
| 7                       | control      | 56  | male   | multiple transfusion                     | 60          | alive   |
| 8                       | control      | 59  | female | sepsis/pneumonia                         | 62          | alive   |
| 9                       | control      | 54  | female | sepsis                                   | 64          | alive   |
| 10                      | control      | 55  | male   | sepsis/pneumonia                         | 67          | alive   |
| 11                      | control      | 54  | female | sepsis                                   | 67          | alive   |
| 12                      | control      | 66  | male   | aspiration                               | 71          | alive   |
| 13                      | control      | 62  | female | sepsis/septic shock                      | 74          | alive   |
| 14                      | control      | 51  | female | pneumonia/trauma                         | 75          | alive   |
| 15                      | control      | 68  | male   | sepsis/septic shock/pneumonia/aspiration | 76          | alive   |
| 16                      | control      | 58  | female | sepsis/septic shock                      | 77          | alive   |
| 17                      | control      | 64  | male   | sepsis/septic shock/pneumonia            | 79          | alive   |
| 18                      | control      | 68  | male   | sepsis/septic shock/pneumonia            | 79          | alive   |
| 19                      | control      | 66  | female | sepsis/pneumonia                         | 82          | alive   |
| 20                      | control      | 51  | male   | sepsis/septic shock/pneumonia            | 83          | alive   |
| 21                      | control      | 70  | female | sepsis/pneumonia                         | 86          | alive   |
| 22                      | control      | 48  | male   | sepsis/septic shock                      | 95          | alive   |
| 23                      | control      | 67  | female | aspiration                               | 101         | alive   |

\* APACHE III score was calculated for each patient within 24 hours of ICU admission.

**Table E3. Complete list of 126 genes with changed expression in peripheral blood between the date of ARDS diagnosis and the date of ICU discharge (paired *t*-test, *p* < 0.05)**

| Symbol           | Probe Set   | Gene Name                                                                             | Gene ID | Fold Change* | MedGene Category † |
|------------------|-------------|---------------------------------------------------------------------------------------|---------|--------------|--------------------|
| <i>PI3</i>       | 203691_at   | peptidase inhibitor 3, skin-derived (SKALP)                                           | 5266    | -2.98        | 1                  |
|                  | 41469_at    |                                                                                       |         | -2.65        |                    |
| <i>IL8</i>       | 202859_x_at | interleukin 8                                                                         | 3576    | -2.93        | 1                  |
|                  | 205592_at   |                                                                                       |         | -1.79        |                    |
| <i>unknown</i>   | 211781_x_at | unknown (gb:BC006164.1)                                                               |         | -2.22        |                    |
| <i>MME</i>       | 203435_s_at | membrane metallo-endopeptidase (neutral endopeptidase, enkephalinase)                 | 4311    | -2.12        | 3                  |
| <i>PTGS2</i>     | 204748_at   | prostaglandin-endoperoxide synthase 2 (prostaglandin G/H synthase and cyclooxygenase) | 5743    | -2.03        | 1                  |
| <i>SGK</i>       | 201739_at   | serum/glucocorticoid regulated kinase                                                 | 6446    | -2.03        | 3                  |
| <i>BNIP3L</i>    | 221478_at   | BCL2/adenovirus E1B 19kDa interacting protein 3-like                                  | 665     | -1.84        | 3                  |
| <i>POLB</i>      | 203616_at   | polymerase (DNA directed), beta                                                       | 5423    | -1.83        | 3                  |
| <i>STAT1</i>     | 200887_s_at | signal transducer and activator of transcription 1, 91kDa                             | 6772    | -1.78        | 3                  |
| <i>FGL2</i>      | 204834_at   | fibrinogen-like 2                                                                     | 10875   | -1.68        | 3                  |
| <i>GPR177</i>    | 221958_s_at | G protein-coupled receptor 177                                                        | 79971   | -1.58        | 3                  |
| <i>PIGF</i>      | 205077_s_at | phosphatidylinositol glycan anchor biosynthesis, class F                              | 5281    | -1.56        | 3                  |
| <i>CLEC7A</i>    | 221698_s_at | C-type lectin domain family 7, member A                                               | 64581   | -1.56        | 3                  |
| <i>C14orf159</i> | 218298_s_at | chromosome 14 open reading frame 159                                                  | 80017   | -1.56        | 4                  |

| <b>Symbol</b>     | <b>Probe Set</b> | <b>Gene Name</b>                                      | <b>Gene ID</b> | <b>Fold Change*</b> | <b>MedGene Category †</b> |
|-------------------|------------------|-------------------------------------------------------|----------------|---------------------|---------------------------|
| <i>TBCC</i>       | 202495_at        | tubulin folding cofactor C                            | 6903           | -1.56               | 4                         |
| <i>LY75</i>       | 205668_at        | lymphocyte antigen 75                                 | 4065           | -1.55               | 3                         |
| <i>BTRC</i>       | 216091_s_at      | beta-transducin repeat containing                     | 8945           | -1.55               | 3                         |
| <i>DUSP6</i>      | 208892_s_at      | dual specificity phosphatase 6                        | 1848           | -1.52               | 3                         |
| <i>ZYG11BL</i>    | 202448_s_at      | zyg-11 homolog B (C. elegans)-like                    | 10444          | -1.50               | 4                         |
| <i>ZNF589</i>     | 210062_s_at      | zinc finger protein 589                               | 51385          | -1.48               | 3                         |
| <i>ZNF133</i>     | 216960_s_at      | zinc finger protein 133                               | 7692           | -1.46               | 3                         |
| <i>ZCCHC10</i>    | 221193_s_at      | zinc finger, CCHC domain containing 10                | 54819          | -1.42               | 4                         |
| <i>XK</i>         | 206698_at        | X-linked Kx blood group (McLeod syndrome)             | 7504           | -1.42               | 4                         |
| <i>WARS</i>       | 200629_at        | tryptophanyl-tRNA synthetase                          | 7453           | -1.42               | 3                         |
| <i>VPS13C</i>     | 218396_at        | vacuolar protein sorting 13 homolog C (S. cerevisiae) | 54832          | -1.41               | 4                         |
| <i>VDAC1</i>      | 217140_s_at      | voltage-dependent anion channel 1                     | 7416           | -1.41               | 3                         |
| <i>UBE2L6</i>     | 201649_at        | ubiquitin-conjugating enzyme E2L 6                    | 9246           | -1.41               | 4                         |
| <i>TUBB2A</i>     | 204141_at        | tubulin, beta 2A                                      | 7280           | -1.40               | 4                         |
| <i>TRGC2 /</i>    | 215806_x_at      | T cell receptor gamma constant 2 / T cell             | 445347         | -1.40               | 3                         |
| <i>TRGV9 /</i>    |                  | receptor gamma variable 9 / TCR gamma                 | / 6967 /       |                     |                           |
| <i>TARP</i>       |                  | alternate reading frame protein                       | 6983           |                     |                           |
|                   | 209813_x_at      |                                                       |                | -1.39               |                           |
| <i>TRBV21-1 /</i> | 211796_s_at      | T cell receptor beta variable 21-1 / T cell           | 28566 /        | -1.39               | 4                         |
| <i>TRBV19 /</i>   |                  | receptor beta variable 19 / T cell receptor beta      | 28568 /        |                     |                           |
| <i>TRBV7-2 /</i>  |                  | variable 7-2 / T cell receptor beta variable 5-4 /    | 28596 /        |                     |                           |
| <i>TRBV5-4 /</i>  |                  | T cell receptor beta variable 3-1 / T cell receptor   | 28611 /        |                     |                           |
| <i>TRBV3-1 /</i>  |                  | beta constant 1                                       | 28619 /        |                     |                           |
| <i>TRBC1</i>      |                  |                                                       | 28639          |                     |                           |

| Symbol          | Probe Set   | Gene Name                                                                          | Gene ID | Fold Change* | MedGene Category † |
|-----------------|-------------|------------------------------------------------------------------------------------|---------|--------------|--------------------|
| <i>TRBV19</i> / | 210915_x_at | T cell receptor beta variable 19 / T cell receptor                                 | 28568 / | -1.39        | 4                  |
| <i>TRBC1</i>    |             | beta constant 1                                                                    | 28639   |              |                    |
| <i>TRAK2</i>    | 202124_s_at | trafficking protein, kinesin binding 2                                             | 66008   | -1.38        | 3                  |
| <i>TRAK1</i>    | 202079_s_at | trafficking protein, kinesin binding 1                                             | 22906   | -1.38        | 3                  |
| <i>TRAC</i>     | 209670_at   | T cell receptor alpha constant                                                     | 28755   | -1.38        | 3                  |
| <i>TRA@</i>     | 211902_x_at | T cell receptor alpha locus                                                        | 6955    | -1.37        | 3                  |
| <i>TRA@</i> /   | 210972_x_at | T cell receptor alpha locus / T cell receptor delta                                | 28517 / | -1.37        | 4                  |
| <i>TRDV2</i> /  |             | variable 2 / T cell receptor alpha variable 20 / T                                 | 28663 / |              |                    |
| <i>TRAV20</i> / |             | cell receptor alpha joining 17 / T cell receptor                                   | 28738 / |              |                    |
| <i>TRAJ17</i> / |             | alpha constant                                                                     | 28755 / |              |                    |
| <i>TRAC</i>     |             |                                                                                    | 6955    |              |                    |
| <i>TNS1</i>     | 221748_s_at | tensin 1                                                                           | 7145    | -1.37        | 3                  |
| <i>TNFSF10</i>  | 202688_at   | tumor necrosis factor (ligand) superfamily,<br>member 10                           | 8743    | -1.36        | 3                  |
| <i>TNFAIP2</i>  | 202510_s_at | tumor necrosis factor, alpha-induced protein 2                                     | 7127    | -1.36        | 3                  |
| <i>TMEM158</i>  | 213338_at   | transmembrane protein 158                                                          | 25907   | -1.36        | 4                  |
| <i>TLE4</i>     | 216997_x_at | transducin-like enhancer of split 4 (E(sp1)<br>homolog, Drosophila)                | 7091    | -1.34        | 3                  |
| <i>THBS1</i>    | 215775_at   | Thrombospondin 1                                                                   | 7057    | -1.34        | 1                  |
| <i>TAF9</i>     | 202168_at   | TAF9 RNA polymerase II, TATA box binding<br>protein (TBP)-associated factor, 32kDa | 6880    | -1.33        | 3                  |
| <i>STK19</i>    | 36019_at    | serine/threonine kinase 19                                                         | 8859    | -1.31        | 2                  |
| <i>SRPRB</i>    | 218140_x_at | signal recognition particle receptor, B subunit                                    | 58477   | -1.31        | 4                  |
| <i>SOD2</i>     | 215223_s_at | superoxide dismutase 2, mitochondrial                                              | 6648    | -1.31        | 1                  |
| <i>SMCHD1</i>   | 212569_at   | structural maintenance of chromosomes flexible<br>hinge domain containing 1        | 23347   | -1.30        | 4                  |



| Symbol              | Probe Set   | Gene Name                                                                        | Gene ID | Fold Change* | MedGene Category † |
|---------------------|-------------|----------------------------------------------------------------------------------|---------|--------------|--------------------|
|                     | 212577_at   |                                                                                  |         | -1.30        |                    |
|                     | 212579_at   |                                                                                  |         | -1.30        |                    |
| <i>SLC16A5</i>      | 213590_at   | solute carrier family 16, member 5<br>(monocarboxylic acid transporter 6)        | 9121    | -1.30        | 4                  |
| <i>SETDB1</i>       | 214197_s_at | SET domain, bifurcated 1                                                         | 9869    | -1.30        | 3                  |
| <i>SELENBP1</i>     | 214433_s_at | selenium binding protein 1                                                       | 8991    | -1.29        | 3                  |
| <i>SCO2</i>         | 205241_at   | SCO cytochrome oxidase deficient homolog 2<br>(yeast)                            | 9997    | -1.29        | 3                  |
| <i>RUNX3</i>        | 204197_s_at | runt-related transcription factor 3                                              | 864     | -1.29        | 3                  |
|                     | 204198_s_at |                                                                                  |         | -1.28        |                    |
| <i>RP3-377H14.5</i> | 222279_at   | hypothetical protein FLJ35429                                                    | 285830  | -1.28        | 4                  |
| <i>RARRES3</i>      | 204070_at   | retinoic acid receptor responder (tazarotene induced) 3                          | 5920    | -1.27        | 3                  |
| <i>RAD9A</i>        | 204828_at   | RAD9 homolog A (S. pombe)                                                        | 5883    | -1.27        | 3                  |
| <i>RAD17</i>        | 207405_s_at | RAD17 homolog (S. pombe)                                                         | 5884    | -1.26        | 3                  |
| <i>PSME2</i>        | 201762_s_at | proteasome (prosome, macropain) activator subunit 2 (PA28 beta)                  | 5721    | -1.26        | 3                  |
| <i>PSME1</i>        | 200814_at   | proteasome (prosome, macropain) activator subunit 1 (PA28 alpha)                 | 5720    | -1.26        | 3                  |
| <i>PPP2R1B</i>      | 202884_s_at | protein phosphatase 2 (formerly 2A), regulatory subunit A (PR 65), beta isoform  | 5519    | -1.26        | 3                  |
| <i>POLS</i>         | 202466_at   | polymerase (DNA directed) sigma                                                  | 11044   | -1.26        | 3                  |
| <i>PLA2G7</i>       | 206214_at   | phospholipase A2, group VII (platelet-activating factor acetylhydrolase, plasma) | 7941    | -1.26        | 2                  |

| Symbol          | Probe Set   | Gene Name                                                                                        | Gene ID | Fold Change* | MedGene Category † |
|-----------------|-------------|--------------------------------------------------------------------------------------------------|---------|--------------|--------------------|
| <i>PDE4B</i>    | 203708_at   | phosphodiesterase 4B, cAMP-specific<br>(phosphodiesterase E4 dunce homolog,<br>Drosophila)       | 5142    | -1.25        | 3                  |
|                 | 222326_at   |                                                                                                  |         | -1.25        |                    |
| <i>PDCD4</i>    | 212594_at   | programmed cell death 4 (neoplastic<br>transformation inhibitor)                                 | 27250   | -1.25        | 3                  |
| <i>PCAF</i>     | 203845_at   | p300/CBP-associated factor                                                                       | 8850    | -1.25        | 3                  |
| <i>PBLD</i>     | 219543_at   | phenazine biosynthesis-like protein domain<br>containing                                         | 64081   | -1.25        | 3                  |
| <i>PARVB</i>    | 37965_at    | parvin, beta                                                                                     | 29780   | -1.24        | 4                  |
| <i>PAIP1</i>    | 213754_s_at | poly(A) binding protein interacting protein 1                                                    | 10605   | -1.24        | 3                  |
| <i>P2RY5</i>    | 218589_at   | purinergic receptor P2Y, G-protein coupled, 5                                                    | 10161   | -1.24        | 3                  |
| <i>OPTN</i>     | 202074_s_at | optineurin                                                                                       | 10133   | -1.24        | 3                  |
| <i>ODC1</i>     | 200790_at   | ornithine decarboxylase 1                                                                        | 4953    | -1.24        | 3                  |
| <i>OCLM</i>     | 208274_at   | oculomedin                                                                                       | 10896   | -1.24        | 4                  |
| <i>NPC2</i>     | 200701_at   | Niemann-Pick disease, type C2                                                                    | 10577   | -1.24        | 3                  |
| <i>NOV</i>      | 214321_at   | nephroblastoma overexpressed gene                                                                | 4856    | -1.23        | 3                  |
| <i>NOD2</i>     | 220066_at   | nucleotide-binding oligomerization domain<br>containing 2                                        | 64127   | -1.23        | 3                  |
| <i>NFATC2IP</i> | 217527_s_at | nuclear factor of activated T-cells, cytoplasmic,<br>calcineurin-dependent 2 interacting protein | 84901   | -1.23        | 4                  |
| <i>NBPF1 /</i>  | 215434_x_at | neuroblastoma breakpoint family, member 1 /                                                      | 440673  | -1.23        | 3                  |
| <i>NBPF10</i>   |             | neuroblastoma breakpoint family, member 10                                                       | / 55672 |              |                    |
| <i>NAPA</i>     | 206491_s_at | N-ethylmaleimide-sensitive factor attachment<br>protein, alpha                                   | 8775    | -1.23        | 3                  |

| <b>Symbol</b>    | <b>Probe Set</b> | <b>Gene Name</b>                                                                   | <b>Gene ID</b> | <b>Fold Change*</b> | <b>MedGene Category †</b> |
|------------------|------------------|------------------------------------------------------------------------------------|----------------|---------------------|---------------------------|
| <i>NAP1L4</i>    | 201414_s_at      | nucleosome assembly protein 1-like 4                                               | 4676           | -1.22               | 3                         |
| <i>MX1</i>       | 202086_at        | myxovirus (influenza virus) resistance 1, interferon-inducible protein p78 (mouse) | 4599           | -1.22               | 3                         |
| <i>MULK</i>      | 222132_s_at      | multiple substrate lipid kinase                                                    | 55750          | -1.22               | 3                         |
| <i>MRPS18A</i>   | 218385_at        | mitochondrial ribosomal protein S18A                                               | 55168          | -1.22               | 4                         |
| <i>MMD</i>       | 203414_at        | monocyte to macrophage differentiation-associated                                  | 23531          | -1.22               | 3                         |
| <i>METTL4</i>    | 219698_s_at      | methyltransferase like 4                                                           | 64863          | -1.22               | 4                         |
| <i>MBOAT2</i>    | 213288_at        | membrane bound O-acyltransferase domain containing 2                               | 129642         | -1.21               | 4                         |
| <i>MBD4</i>      | 214048_at        | methyl-CpG binding domain protein 4                                                | 8930           | -1.21               | 3                         |
| <i>MARCH8</i>    | 221824_s_at      | membrane-associated ring finger (C3HC4) 8                                          | 220972         | -1.21               | 3                         |
| <i>MAN2A2</i>    | 219999_at        | mannosidase, alpha, class 2A, member 2                                             | 4122           | -1.21               | 4                         |
| <i>LOC646912</i> | 217092_x_at      | similar to 60S ribosomal protein L7                                                | 646912         | -1.21               | 4                         |
| <i>LOC54103</i>  | 222150_s_at      | hypothetical protein LOC54103                                                      | 54103          | -1.21               | 4                         |
| <i>CLEC2B /</i>  | 209732_at        | C-type lectin domain family 2, member B /                                          | 94158 /        | 1.21                | 4                         |
| <i>CDRT15P</i>   |                  | CMT1A duplicated region transcript 15 pseudogene                                   | 9976           |                     |                           |
| <i>CLCN5</i>     | 206704_at        | chloride channel 5 (nephrolithiasis 2, X-linked, Dent disease)                     | 1184           | 1.22                | 3                         |
| <i>CLC</i>       | 206207_at        | Charcot-Leyden crystal protein                                                     | 1178           | 1.22                | 3                         |
| <i>CIR</i>       | 209571_at        | CBF1 interacting corepressor                                                       | 9541           | 1.23                | 3                         |
| <i>CHRNE</i>     | 215916_at        | cholinergic receptor, nicotinic, epsilon                                           | 1145           | 1.23                | 4                         |
| <i>CECRI</i>     | 219505_at        | cat eye syndrome chromosome region, candidate                                      | 51816          | 1.23                | 3                         |

| Symbol          | Probe Set   | Gene Name                                                                 | Gene ID | Fold Change* | MedGene Category † |
|-----------------|-------------|---------------------------------------------------------------------------|---------|--------------|--------------------|
| <i>CDC2L1</i> / | 211289_x_at | cell division cycle 2-like 1 (PITSLRE proteins) /                         | 984 /   | 1.23         | 3                  |
| <i>CDC2L2</i>   |             | cell division cycle 2-like 2 (PITSLRE proteins)                           | 985     |              |                    |
| <i>CD74</i>     | 209619_at   | CD74 molecule, major histocompatibility complex, class II invariant chain | 972     | 1.24         | 3                  |
| <i>CD52</i>     | 34210_at    | CD52 molecule                                                             | 1043    | 1.24         | 3                  |
| <i>CD3E</i>     | 205456_at   | CD3e molecule, epsilon (CD3-TCR complex)                                  | 916     | 1.26         | 3                  |
| <i>CD36</i>     | 209555_s_at | CD36 molecule (thrombospondin receptor)                                   | 948     | 1.26         | 3                  |
| <i>CD2</i>      | 205831_at   | CD2 molecule                                                              | 914     | 1.26         | 1                  |
| <i>CD14</i>     | 201743_at   | CD14 molecule                                                             | 929     | 1.27         | 1                  |
| <i>CCL5</i>     | 204655_at   | chemokine (C-C motif) ligand 5                                            | 6352    | 1.30         | 3                  |
| <i>CASP9</i>    | 203984_s_at | caspase 9, apoptosis-related cysteine peptidase                           | 842     | 1.30         | 3                  |
| <i>C1orf50</i>  | 62212_at    | chromosome 1 open reading frame 50                                        | 79078   | 1.31         | 4                  |
| <i>BTN3A3</i>   | 38241_at    | butyrophilin, subfamily 3, member A3                                      | 10384   | 1.32         | 4                  |
| <i>BLVRB</i>    | 202201_at   | biliverdin reductase B (flavin reductase (NADPH))                         | 645     | 1.33         | 3                  |
| <i>BCL2L1</i>   | 215037_s_at | BCL2-like 1                                                               | 598     | 1.34         | 3                  |
| <i>BAG1</i>     | 202387_at   | BCL2-associated athanogene                                                | 573     | 1.36         | 3                  |
| <i>ATP2B1</i>   | 209281_s_at | ATPase, Ca <sup>++</sup> transporting, plasma membrane 1                  | 490     | 1.37         | 3                  |
| <i>ATG4B</i>    | 204903_x_at | ATG4 autophagy related 4 homolog B (S. cerevisiae)                        | 23192   | 1.38         | 3                  |
| <i>ASCC2</i>    | 215684_s_at | activating signal cointegrator 1 complex subunit 2                        | 84164   | 1.39         | 4                  |
| <i>ARL4C</i>    | 202207_at   | ADP-ribosylation factor-like 4C                                           | 10123   | 1.39         | 3                  |
| <i>APOBEC3G</i> | 204205_at   | apolipoprotein B mRNA editing enzyme, catalytic polypeptide-like 3G       | 60489   | 1.40         | 3                  |

| Symbol          | Probe Set   | Gene Name                                                                                      | Gene ID | Fold Change* | MedGene Category † |
|-----------------|-------------|------------------------------------------------------------------------------------------------|---------|--------------|--------------------|
| <i>APBB1IP</i>  | 219994_at   | amyloid beta (A4) precursor protein-binding, family B, member 1 interacting protein            | 54518   | 1.40         | 3                  |
| <i>AMPD2</i>    | 212360_at   | adenosine monophosphate deaminase 2 (isoform L)                                                | 271     | 1.46         | 3                  |
| <i>ABLIM1</i>   | 210461_s_at | actin binding LIM protein 1                                                                    | 3983    | 1.47         | 3                  |
| <i>ABCA1</i>    | 203505_at   | ATP-binding cassette, sub-family A (ABC1), member 1                                            | 19      | 1.48         | 3                  |
| <i>HIP2</i>     | 202346_at   | huntingtin interacting protein 2                                                               | 3093    | 1.55         | 3                  |
| <i>OSBPL1A</i>  | 208158_s_at | oxysterol binding protein-like 1A                                                              | 114876  | 1.58         | 4                  |
| <i>STXBP2</i>   | 209367_at   | syntaxin binding protein 2                                                                     | 6813    | 1.62         | 4                  |
| <i>IDI1</i>     | 204615_x_at | isopentenyl-diphosphate delta isomerase 1                                                      | 3422    | 1.58         | 3                  |
|                 | 208881_x_at |                                                                                                |         | 1.65         |                    |
| <i>HSPA1A /</i> | 200800_s_at | heat shock 70kDa protein 1A / heat shock                                                       | 3303 /  | 1.66         | 1                  |
| <i>HSPA1B</i>   |             | 70kDa protein 1B                                                                               | 3304    |              |                    |
| <i>GALNT2</i>   | 217788_s_at | UDP-N-acetyl-alpha-D-galactosamine:polypeptide N-acetylgalactosaminyltransferase 2 (GalNAc-T2) | 2590    | 1.83         | 3                  |
| <i>PDGFC</i>    | 218718_at   | platelet derived growth factor C                                                               | 56034   | 2.08         | 3                  |
| <i>HPGD</i>     | 203914_x_at | hydroxyprostaglandin dehydrogenase 15-(NAD)                                                    | 3248    | 2.00         | 3                  |
|                 | 203913_s_at |                                                                                                |         | 2.29         |                    |
| <i>GADD45A</i>  | 203725_at   | growth arrest and DNA-damage-inducible, alpha                                                  | 1647    | 2.38         | 3                  |

\* A negative number of fold change means the gene was down-regulated during the acute-stage of ARDS, and a positive number of fold change means the gene was up-regulated during the acute-stage.

† The gene list was sorted in MedGene database by the linkage of genes and ARDS. 1: first-degree association, genes that have been directly linked to ARDS by gene term

search; 2: first-degree associations by family term, genes that have been directly linked to this disease by family term search; 3: second degree associations, genes that have never been co-cited with ARDS, but have been linked to at least one first-degree gene; and 4: Genes new to ARDS, genes that have not been previously associated with this disease.

**Table E4. Literature mining of ARDS-related genes in Medline Database against 28 altered genes identified by microarray analysis**

|                          | Top<br>Ranked<br>Genes ‡ | Genes Identified from Microarray Analysis <sup>§</sup> |                                                                                     |                                               |
|--------------------------|--------------------------|--------------------------------------------------------|-------------------------------------------------------------------------------------|-----------------------------------------------|
|                          |                          | Total                                                  | Down-regulated at acute stage                                                       | Up-regulated at acute stage                   |
| <b>Disease*</b>          |                          |                                                        |                                                                                     |                                               |
| ARDS                     | 100                      | 7                                                      | <i>IL8, PI3</i>                                                                     | <i>CD14</i>                                   |
| <b>MeSH Vocabulary †</b> |                          |                                                        |                                                                                     |                                               |
| Neutrophil               | 538                      | 22                                                     | <i>IL8, LY75, MBD4, PCAF, PDE4B, PI3, SELENBP1, STAT1, THBS1, VDAC1, WARS</i>       | <i>ABCA1, CCL5, CD14, CD36, CD74</i>          |
| Leukotriene              | 419                      | 17                                                     | <i>IL8, PI3, PTGS2</i>                                                              | <i>ABCA1, BCL2LI, CCL5, CD14, HPGD</i>        |
| Prostaglandin            | 754                      | 22                                                     | <i>FGL2, IL8, MMD, OPTN, PDCD4, PDE4B, PIGF, POLB, PTGS2, STAT1, STK19, TNFSF10</i> | <i>ABCA1, CD2, CD36, GADD45A, HPGD, PDGFC</i> |

\* Text mining through MedGene project at Harvard Institute of Proteomics (<http://www.hip.harvard.edu>, by 3/14/2007) for genes associated with ARDS (MeSH term: Respiratory Distress Syndrome, Adult) in the Medline Database.

† Text mining through BioGene project at Harvard Institute of Proteomics (<http://www.hip.harvard.edu>, by 3/14/2007) for genes associated with ARDS-related MeSH vocabularies in the Medline Database.

‡ The statistical method used to rank the gene list is product of frequency. The project allows downloading maximum number of 100 top-ranked genes for each disease or MeSH vocabulary, without specific request for longer gene list. The

numbers of top-ranked genes of MeSH mining are the combined lists of non-redundant genes of all sub-vocabularies available at BioGene (by 3/14/2007).

§ Genes with altered expression in microarray analysis were found in ARDS-related text mining.



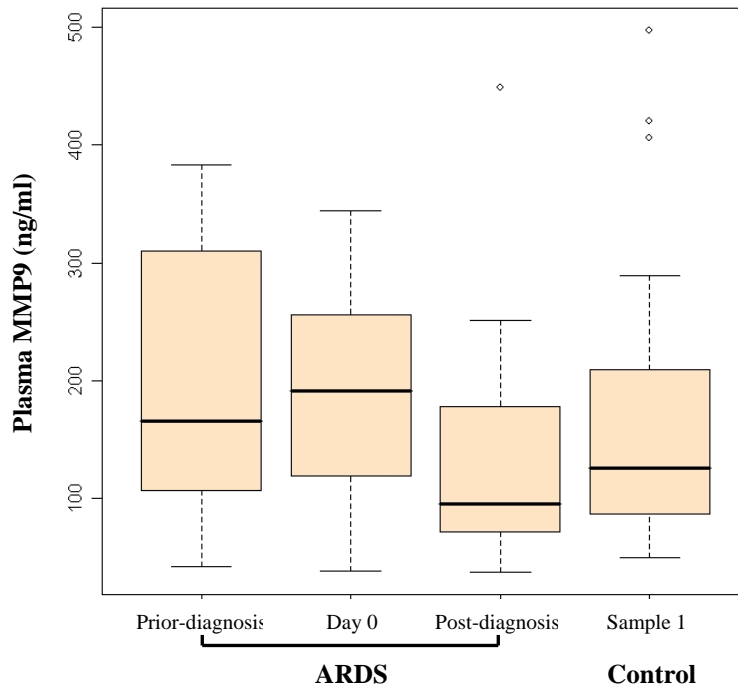

|                              | n  | Mean<br>(ng/μl) | 95% CI       |
|------------------------------|----|-----------------|--------------|
| <b>ARDS</b>                  |    |                 |              |
| Pre-diagnosis (Day -5 to -2) | 11 | 192.1           | 120.4, 263.8 |
| Day of diagnosis (Day 0)     | 11 | 192.1           | 134.7, 249.4 |
| Post-diagnosis (Day 1 to 3)  | 15 | 141.1           | 86.6, 195.5  |
| <b>Control</b>               |    |                 |              |
| Sample 1                     | 21 | 194.2           | 139.5, 249.0 |
| Sample 2, +3 day             | 18 | 203.0           | 132.9, 273.2 |

**Figure E1. Levels of MMP9 in plasma of ARDS patients and critical ill patients who did not develop ARDS (controls).** Each ARDS case provides one plasma sample. Based on the date of sample collection relative to the ARDS diagnosis date, including pre-diagnosis group (Day -5 to Day -1), day of diagnosis group (Day 0), and post-diagnosis group (Day 1 to Day 3). Sample 1 of control was collected during the first two days of ICU admission. There was no statistically significant difference in baseline characteristics between ARDS cases and controls, except that ARDS cases more frequently received transfusion ( $p = 0.009$ ). There is no statistically significant difference existed in plasma levels of MMP-9 between ARDS cases and at-risk controls.

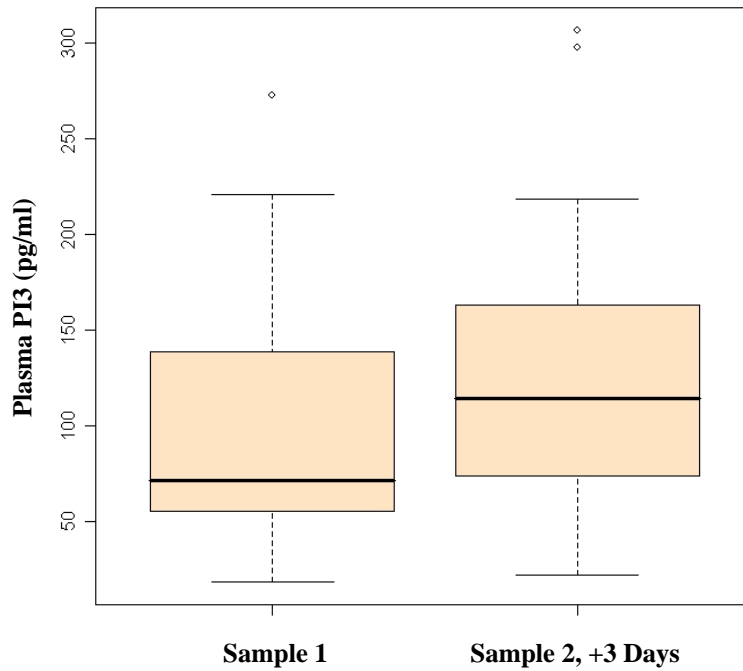

**Figure E2. Levels of pre-elafin (PI3) in plasma of critical ill patients who did not develop ARDS (controls).** All controls provided paired plasma samples. Sample 1 was collected during the first two days of ICU admission; and Sample 2 was collected three days after Sample 1. Significant increase of plasma PI3 levels (mean ratio = 1.53, 95% CI, 1.28 – 1.78;  $p = 0.0007$ ) in Sample 2 (three days after the first 24 hours of ICU admission) was observed using paired  $t$ -test.
